# Supplementary material
Source: ML conference proceedings conference paper supplement (https://proceedings.neurips.cc/paper_files/paper/2017/hash/4e0928de075538c593fbdabb0c5ef2c3-Abstract.html)
Supplement: Supplementary file [file 4e0928de075538c593fbdabb0c5ef2c3-Supplemental.zip]

---

# Learning spatiotemporal piecewise-geodesic trajectories from longitudinal manifold-valued data.

## Supplementary material

---

**Juliette Chevallier**  
 CMAP, École polytechnique  
 juliette.chevallier@polytechnique.edu

**Pr Stéphane Oudard**  
 Oncology Department  
 USPC, AP-HP, HEGP

**Stéphanie Allasonnière**  
 CRC, Université Paris Descartes  
 stephanie.allasonniere@parisdescartes.fr

### 1 Details about the MCMC-SAEM algorithm

Here, we explicit the MCMC-SAEM algorithm we are use to perform the experiments. We recall that

$$y_{i,j} = \left[ r_i^1 (\gamma_i^1(t_{i,j}) - \gamma_0(t_R)) + \gamma_0(t_R) + \delta_i \right] \mathbb{1}_{]-\infty, t_R^i]}(t_{i,j}) \\ + \left[ r_i^2 (\gamma_i^2(t_{i,j}) - \gamma_0(t_R)) + \gamma_0(t_R) + \delta_i \right] \mathbb{1}_{]t_R^i, +\infty[}(t_{i,j}) + \varepsilon_{i,j}$$

where

$$\gamma_0^{\text{init}} \sim \mathcal{N}(\overline{\gamma_0^{\text{init}}}, \sigma_{\text{init}}^2) \quad ; \quad \gamma_0^{\text{échap}} \sim \mathcal{N}(\overline{\gamma_0^{\text{échap}}}, \sigma_{\text{échap}}^2) \quad ; \quad \gamma_0^{\text{fin}} \sim \mathcal{N}(\overline{\gamma_0^{\text{fin}}}, \sigma_{\text{fin}}^2) \\ t_R \sim \mathcal{N}(\overline{t_R}, \sigma_R^2) \quad ; \quad t_1 \sim \mathcal{N}(\overline{t_1}, \sigma_1^2) \quad ; \quad P_i \stackrel{i.i.d}{\sim} \mathcal{N}(0, \Sigma)$$

and  $\theta = (\overline{\gamma_0^{\text{init}}}, \overline{\gamma_0^{\text{échap}}}, \overline{\gamma_0^{\text{fin}}}, \overline{t_R}, \overline{t_1}, \Sigma, \sigma) \in \Theta$ , the space of admissible parameters.

**Prior distribution** : As explain in the article, according to the proof of the existence of the MAP (see bellow), there is no need to put prior on the population parameters. Thus,

$$q_{\text{prior}}(\theta) \propto \left( \frac{\sqrt{|V|}}{2^{\frac{p}{2}} \sqrt{|\Sigma|}} \exp \left( -\frac{1}{2} \text{tr} (V \Sigma^{-1}) \right) \right)^{m_{\Sigma}} \times \left( \frac{v}{\sigma \sqrt{2}} \exp \left( -\frac{v^2}{2\sigma^2} \right) \right)^{m_{\sigma}}.$$

**Sufficient statistics** : The complete log-likelihood writes

$$\begin{aligned}
\log q(y, z, \theta) = & -\frac{1}{2} \left[ \left( \frac{\gamma_0^{\text{init}} - \overline{\gamma_0^{\text{init}}}}{\sigma_{\text{init}}} \right)^2 + \left( \frac{\gamma_0^{\text{échap}} - \overline{\gamma_0^{\text{échap}}}}{\sigma_{\text{échap}}} \right)^2 + \left( \frac{\gamma_0^{\text{fin}} - \overline{\gamma_0^{\text{fin}}}}{\sigma_{\text{fin}}} \right)^2 \right] \\
& -\frac{1}{2} \left[ \left( \frac{t_R - \overline{t_R}}{\sigma_R} \right)^2 + \left( \frac{t_1 - \overline{t_1}}{\sigma_1} \right)^2 \right] \\
& -\frac{m_\Sigma}{2} \sum_{i=1}^n \left( {}^t P_i \Sigma^{-1} P_i \right) + \frac{m_\Sigma}{2} (\log(|V|) - \log(|\Sigma|)) - \frac{1}{2} \text{tr}(V \Sigma^{-1}) \\
& -\frac{1}{2\sigma^2} \sum_{i=1}^n \sum_{j=1}^{k_i} \left( y_{i,j} - \gamma_i(t_{i,j}) \right)^2 - \frac{n}{2} \log(|\Sigma|) + m_\sigma \log\left(\frac{v}{\sigma}\right) - \frac{m_\sigma}{2} \left(\frac{v}{\sigma}\right)^2 \\
& + \text{constants}
\end{aligned}$$

and thus, we set

$$\begin{aligned}
S_1(y, z) &= \gamma_0^{\text{init}} \quad ; \quad S_2(y, z) = \gamma_0^{\text{échap}} \quad ; \quad S_3(y, z) = \gamma_0^{\text{fin}} \\
S_4(y, z) &= t_R \quad ; \quad S_5(y, z) = t_1 \quad ; \quad S_6(y, z) = \frac{1}{n} \sum_{i=1}^n {}^t P_i P_i \in \mathcal{M}_p \mathbb{R} \\
S_7(y, z) &= \frac{1}{k} \sum_{i=1}^n \sum_{j=1}^{k_i} \left( y_{i,j} - \gamma_i(t_{i,j}) \right)^2.
\end{aligned}$$

**Maximisation step** : We simply calculate the partial derivative of the log-likelihood. It comes:

$$\begin{aligned}
\overline{\gamma_0^{\text{init}}}^{(\text{iter}+1)} &= S_1(y, z^{(\text{iter})}) \quad ; \quad \overline{\gamma_0^{\text{échap}}}^{(\text{iter}+1)} = S_2(y, z^{(\text{iter})}) \quad ; \quad \overline{\gamma_0^{\text{fin}}}^{(\text{iter}+1)} = S_3(y, z^{(\text{iter})}) \\
\overline{t_R}^{(\text{iter}+1)} &= S_4(y, z^{(\text{iter})}) \quad ; \quad \overline{t_1}^{(\text{iter}+1)} = S_5(y, z^{(\text{iter})})
\end{aligned}$$

and

$$\Sigma^{(\text{iter}+1)} = \frac{n S_6(y, z^{(\text{iter})}) + m_\Sigma V}{n + m_\Sigma} \quad ; \quad \sigma^{2(\text{iter}+1)} = \frac{k S_7(y, z^{(\text{iter})}) + m_\sigma v^2}{k + m_\sigma}.$$

In particular, the upgraded variances are barycenters between the corresponding sufficient statistics and the priors. Finally, given an adapted sampler (the Symetric Random Walk Hastings-Metropolis within Gibbs Sampler for instance) and the following the sequence  $(\varepsilon_{\text{iter}})_{\text{iter} > 0}$

$$\forall \text{iter} \geq 1, \quad \varepsilon_{\text{iter}} = \begin{cases} 1 & \text{if } \text{iter} \geq \text{Nburnin} \\ (\text{iter} - \text{Nburnin})^{-0.65} & \text{else} \end{cases}.$$

our algorithm writes:

---

**Algorithm 1:** Overview of the SAEM for the Piecewise-Logistic model.

---

**Input:**  $\theta^* = (\overline{\gamma_0^{\text{init}}}, \overline{\gamma_0^{\text{escap}}}, \overline{\gamma_0^{\text{fin}}}, \overline{t_R}, \overline{t_1}, \Sigma, \sigma^*), (V, m_\Sigma), (v, m_\sigma), \text{maxIter}, \text{Nburnin}$ .

**Output:**  $\theta = (\overline{\gamma_0^{\text{init}}}, \overline{\gamma_0^{\text{escap}}}, \overline{\gamma_0^{\text{fin}}}, \overline{t_R}, \overline{t_1}, \Sigma, \sigma)$ .

```

1 # Initialization:  $\theta = (\overline{\gamma_0^{\text{init}}}, \overline{\gamma_0^{\text{escap}}}, \overline{\gamma_0^{\text{fin}}}, \overline{t_R}, \overline{t_1}, \Sigma, \sigma) \leftarrow \theta^*$ ;  $S \leftarrow 0$ ;  $(\varepsilon_{\text{iter}})_{\text{iter} > 0}$ ;
2  $z_{\text{pop}} \leftarrow (\overline{\gamma_0^{\text{init}}}, \overline{\gamma_0^{\text{escap}}}, \overline{\gamma_0^{\text{fin}}}, \overline{t_R}, \overline{t_1})$ ;  $(P_i)_i \leftarrow 0$ ;
3 for  $\text{iter} = 1$  to  $\text{maxIter}$  do
4   # Simulation:  $(\gamma_0^{\text{init}}, \gamma_0^{\text{escap}}, \gamma_0^{\text{fin}}, t_R, t_1, (P_i)_i) \leftarrow \text{sampler}(\gamma_0^{\text{init}}, \gamma_0^{\text{escap}}, \gamma_0^{\text{fin}}, t_R, t_1, (P_i)_i)$ ;
5   # Stochastic Approximation:  $S_1 \leftarrow S_1 + \varepsilon_{\text{iter}} (\gamma_0^{\text{init}} - S_1)$ ;
6      $S_2 \leftarrow S_2 + \varepsilon_{\text{iter}} (\gamma_0^{\text{escap}} - S_2)$ ;
7      $S_3 \leftarrow S_3 + \varepsilon_{\text{iter}} (\gamma_0^{\text{fin}} - S_3)$ ;  $S_4 \leftarrow S_4 + \varepsilon_{\text{iter}} (t_R - S_4)$ ;
8      $S_5 \leftarrow S_5 + \varepsilon_{\text{iter}} (t_1 - S_5)$ ;
9      $S_6 \leftarrow S_6 + \varepsilon_{\text{iter}} (\frac{1}{n} \sum_i t P_i P_i - S_6)$ ;
10     $S_7 \leftarrow S_7 + \varepsilon_{\text{iter}} (\frac{1}{k} \sum_{i=1}^n \sum_{j=1}^{k_i} (y_{i,j} - \gamma_i(t_{i,j}))^2 - S_7)$ ;
11  # Maximization:  $\overline{\gamma_0^{\text{init}}} \leftarrow S_1$ ;  $\overline{\gamma_0^{\text{escap}}} \leftarrow S_2$ ;  $\overline{\gamma_0^{\text{fin}}} \leftarrow S_3$ ;  $\overline{t_R} \leftarrow S_4$ ;  $\overline{t_1} \leftarrow S_5$ ;
12   $\Sigma \leftarrow \frac{n S_6 + m_\Sigma V}{n + m_\Sigma}$ ;  $\sigma \leftarrow \sqrt{\frac{k S_7 + m_\sigma v^2}{k + m_\sigma}}$ ;
13 end

```

---

## 2 Proof of the existence of the Maximum a Posteriori

**Theorem 1** (Existence of the MAP). *Given the piecewise-logistic model and the choice of probability distributions for the parameters and latent variables of the model, for any dataset  $(t_{i,j}, y_{i,j})_{i \in \llbracket 1, n \rrbracket, j \in \llbracket 1, k_i \rrbracket}$ , there exists  $\hat{\theta}_{\text{MAP}} \in \underset{\theta \in \Theta}{\operatorname{argmax}} q(\theta|y)$ .*

The demonstration of the theorem uses the following lemma.

**Lemma 1.** *Given the piecewise-logistic model, the choice of probability distribution for the parameters and latent variables of the model, the posterior  $\theta \in \Theta \mapsto q(\theta|y)$  is continuous on the parameter space  $\Theta$ .*

*Proof.* Let  $\mathcal{Z}$  denote the space of latent variables in the piecewise-logistic model:

$$\mathcal{Z} = \{ (z_{\text{pop}}, (z_i)_{1 \leq i \leq n}) \mid z_{\text{pop}} \in \mathbb{R}^5, \forall i \in \llbracket 1, n \rrbracket, z_i \in \mathbb{R}^p \}$$

Using Bayes rule, for all  $\theta \in \Theta$ ,  $q(\theta|y) = \frac{1}{q(y)} \left( \int_{\mathcal{Z}} q(y|z, \theta) q(z|\theta) dz \right) q_{\text{prior}}(\theta)$ . The density function  $\theta \mapsto q_{\text{prior}}(\theta)$  is trivially continuous on  $\Theta$  as a product of continuous functions. Likewise, for all  $z \in \mathcal{Z}$ ,  $\theta \mapsto q(y|z, \theta) q(z|\theta)$  is continuous. Moreover, for all  $z \in \mathcal{Z}$  and  $\theta \in \Theta$ ,

$$q(y|z, \theta) = \frac{1}{(\sigma \sqrt{2\pi})^k} \exp \left( -\frac{1}{\sigma^2} \sum_{i=1}^n \sum_{j=1}^{k_i} (y_{i,j} - \gamma_i(t_{i,j}))^2 \right)$$

and so, for all  $z \in \mathcal{Z}$  and  $\theta \in \Theta$ ,  $q(y|z, \theta) q(z|\theta) \leq \frac{1}{(\sigma \sqrt{2\pi})^k} q(z|\theta)$  which is positive and integrable as a probability distribution function. As a consequence,  $z \mapsto q(y|z, \theta) q(z|\theta)$  is integrable – and positive – on  $\mathcal{Z}$  for all  $\theta \in \Theta$  and  $\theta \mapsto q(y|\theta)$  is continuous.  $\square$

*Proof of theorem 1.* Given the result of the lemma 1 and considering the Alexandrov one-point compactification  $\overline{\Theta} = \Theta \cup \{\infty\}$ , it suffices to prove that  $\lim_{\theta \rightarrow \infty} \log q(\theta|y) = -\infty$ . We keep the notation of the previous proof and proceed similarly. In particular, for all  $\theta \in \Theta$ ,

$$\log q(\theta|y) \leq -\log q(y) - k \log(\sqrt{2\pi}) - k \log(\sigma) + \log q_{\text{prior}}(\theta).$$

By computing the prior distribution  $q_{prior}$ , we remark that there exist  $C$  which does not depend on the parameter  $\theta$  such as

$$\log q(\theta|y) \leq C(y) - (k + m_\sigma) \log(\sigma) - \frac{m_\Sigma}{2} \log(|\Sigma|) - \frac{m_\Sigma}{2} \text{tr}(V\Sigma^{-1}) - \frac{m_\sigma}{2} \left(\frac{v}{\sigma}\right)^2$$

Let  $\mu(V)$  denote the smallest eigenvalue of  $V$  and  $\rho(\Sigma^{-1})$  the largest one of  $\Sigma^{-1}$ , which is also its operator norm. We know that  $\langle \Sigma | V \rangle_F \geq \mu(V)\rho(\Sigma^{-1})$  and  $\log(|\Sigma^{-1}|) \leq p \log(\|\Sigma^{-1}\|)$  so that

$$-\frac{m_\Sigma}{2} \text{tr}(V\Sigma^{-1}) + \frac{m_\Sigma}{2} \log(|\Sigma^{-1}|) \leq \frac{m_\Sigma}{2} [-\mu(V) \|\Sigma^{-1}\| + p \log(\|\Sigma^{-1}\|)]$$

and

$$\lim_{\|\Sigma\| + \|\Sigma^{-1}\| \rightarrow +\infty} \left\{ -\frac{m_\Sigma}{2} \text{tr}(V\Sigma^{-1}) + \frac{m_\Sigma}{2} \log(|\Sigma^{-1}|) \right\} = -\infty.$$

Likewise,

$$\lim_{\sigma + \sigma^{-1} \rightarrow +\infty} \left\{ -(k + m_\sigma) \log(\sigma) - \frac{m_\sigma}{2} \left(\frac{v}{\sigma}\right)^2 \right\} = -\infty$$

hence the result.  $\square$

We have detailed the computation in the previous proof in order to emphasize the necessity of prior distribution on the variances  $\Sigma$  and  $\sigma$  to have the existence of the *maximum a posteriori*.
